# Supplementary material for: On the configuration, molecular structure and vibrational properties of MoOx sites on alumina, zirconia, titania and silica
Source: Royal Society of Chemistry journal article supplement (doi:10.1039/c3cy00057e), 2013-01-01
Supplement: c3cy00057e.pdf [file c3cy00057e.pdf]

**On the configuration, molecular structure and vibrational properties of  
MoO<sub>x</sub> sites on alumina, zirconia, titania and silica**

George Tsilomelekis and Soghomon Boghosian\*

*Department of Chemical Engineering, University of Patras and Institute of Chemical  
Engineering and High Temperature Chemical Processes, Foundation of Research and  
Technology – Hellas (FORTH/ICH-HT), Patras, Greece*

**SUPPLEMENTARY MATERIAL**

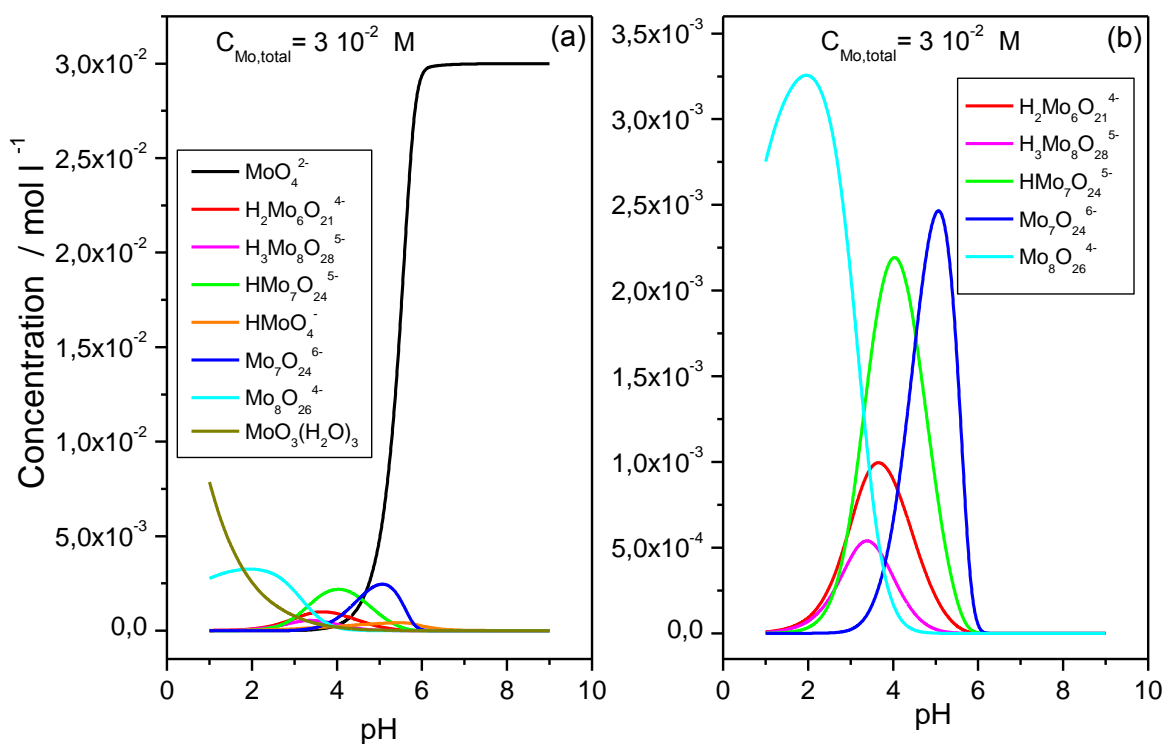

Fig A1. Variation of the concentration of the Mo(VI) oxo-species with the pH of the solution for a Mo(VI) total concentration equal to  $3 \times 10^{-2} \text{ M}$ : (a) all oxo-species, (b) polymeric oxo-species. The Mo(VI) oxo-species are indicated.
